# Supplementary material for: Effect of a single water molecule on ˙CH2OH + 3O2 reaction under atmospheric and combustion conditions
Source: Royal Society of Chemistry journal article supplement (doi:10.1039/d1cp03911c), 2021-11-25

### \*\*\*Supplementary Materials\*\*\*

## Effect of a Single Water Molecule on $\cdot\text{CH}_2\text{OH} + {}^3\text{O}_2$ Reaction Under Atmospheric and Combustion Conditions

Manas Ranjan Dash<sup>b</sup> and Mohamad Akbar Ali <sup>\*a</sup>,

<sup>a</sup>Department of Chemistry, College of Science, King Faisal University, Al-Ahsa 31982, Saudi Arabia.

<sup>b</sup>Department of Chemistry, National Institute of Technology, Raipur 492010, India

Corresponding author e-mail: [aamohamad@kfu.edu.sa](mailto:aamohamad@kfu.edu.sa)

#### *Table of Contents*

**Table S1:** Redundant internal coordinates of reactants, complexes, products and transition states obtained using  $\omega\text{B97XD/6-311++G(3df,3pd)}$  taken from Gaussian checkpoint file.....**Page 2**

**Table S2:** Calculated equilibrium constants ( $K_{eq}$  in  $\text{cm}^3 \text{ molecule}^{-1}$ ) for the formation of two-body complex .....**Page 8**

**Table S3:** Calculated equilibrium constants ( $K_{eq}$  in  $\text{cm}^3 \text{ molecule}^{-1}$ ) for the formation of three-body complex..... **Page 9**

**Table S4:** Calculated rate coefficients using TST, CVT methods.....**Page 10**

**Figure S1:** IRC Calculations for the important transition state.....**Page 11**

**Table S1:** Redundant internal coordinates of reactants, complexes, products and transition states obtained using  $\omega$ B97XD /6-311++G(3df,3pd) taken from Gaussian checkpoint file.

**CH<sub>2</sub>OH**

|   |              |               |               |               |
|---|--------------|---------------|---------------|---------------|
| C | 0.0000000000 | -0.0479873592 | -0.1680771006 | 0.0781764968  |
| H | 0.0000000000 | 0.0448843049  | 0.3020170625  | 1.0433913037  |
| H | 0.0000000000 | 0.7521442963  | -0.1296883463 | -0.6483320063 |
| O | 0.0000000000 | -1.3292810800 | -0.2757552508 | -0.3579257849 |
| H | 0.0000000000 | -1.3423365585 | -0.6335930447 | -1.2453100093 |

**O<sub>2</sub>**

|   |              |              |              |              |
|---|--------------|--------------|--------------|--------------|
| O | 0.0000000000 | 0.0000000000 | 0.0000000000 | 0.0010162690 |
| O | 0.0000000000 | 0.0000000000 | 0.0000000000 | 1.1962557310 |

**Int-1**

|   |              |               |               |               |
|---|--------------|---------------|---------------|---------------|
| C | 0.0000000000 | -0.0136173982 | -0.0018612394 | -0.0065157207 |
| H | 0.0000000000 | -0.0362616134 | -0.0057103923 | 1.0845884939  |
| H | 0.0000000000 | 1.0005688338  | -0.0034840193 | -0.3941850512 |
| O | 0.0000000000 | -0.7014806529 | 1.0386106156  | -0.5658053046 |
| H | 0.0000000000 | -1.5813501252 | 1.0657771913  | -0.1825106846 |
| O | 0.0000000000 | -0.5569120684 | -1.2894048393 | -0.4189985272 |
| O | 0.0000000000 | -1.7786250420 | -1.4082990867 | 0.0085987305  |

**TS1**

|   |              |               |               |               |
|---|--------------|---------------|---------------|---------------|
| C | 0.0000000000 | 0.7778479870  | 0.5188872922  | 0.0000003791  |
| H | 0.0000000000 | 1.0974391974  | 1.0997494287  | 0.8912787504  |
| H | 0.0000000000 | 1.0974399344  | 1.0997495277  | -0.8912776623 |
| O | 0.0000000000 | -0.6713657221 | 0.7119820022  | -0.0000002082 |
| O | 0.0000000000 | -1.2599204979 | -0.5172832328 | -0.0000005099 |
| H | 0.0000000000 | -0.4571142346 | -1.1106495963 | -0.0000002101 |
| O | 0.0000000000 | 1.1453363358  | -0.7086694217 | 0.0000004609  |

**TS2**

|   |              |               |               |               |
|---|--------------|---------------|---------------|---------------|
| C | 0.0000000000 | 0.0047414116  | -0.0017007418 | -0.0011865644 |
| H | 0.0000000000 | -0.0132250789 | 0.0071822004  | 1.0947835745  |
| H | 0.0000000000 | 1.0099326796  | -0.0143783455 | -0.4418680230 |
| O | 0.0000000000 | -0.9487698935 | 0.5326773494  | -0.6351675253 |
| O | 0.0000000000 | -0.3736892734 | -1.6335399664 | -0.2936066603 |
| O | 0.0000000000 | -1.3314041748 | -2.0425278989 | 0.5686825960  |
| H | 0.0000000000 | -2.0958574211 | -2.1964377601 | -0.0010911089 |

**TS3**

|   |              |               |               |               |
|---|--------------|---------------|---------------|---------------|
| C | 0.0000000000 | -0.0099275292 | 0.0059433231  | -0.0172578354 |
| H | 0.0000000000 | -0.0073840023 | -0.0277841762 | 1.2892156183  |
| H | 0.0000000000 | 1.0293033187  | 0.0170113908  | -0.3406410977 |
| O | 0.0000000000 | -0.7325117671 | 0.9887830095  | -0.5928394227 |
| H | 0.0000000000 | -1.6665664547 | 0.7867985606  | -0.4781313436 |
| O | 0.0000000000 | -0.6016630224 | -1.2259565038 | 0.0400796887  |
| O | 0.0000000000 | -0.5857771847 | -1.1939626649 | 1.5037187988  |

**TS4**

|   |              |               |               |               |
|---|--------------|---------------|---------------|---------------|
| C | 0.0000000000 | 0.0003291152  | 0.0010278569  | -0.0003268339 |
| H | 0.0000000000 | -0.0073042260 | 0.0041305342  | 1.0881253939  |
| H | 0.0000000000 | 0.9893060938  | -0.0053338116 | -0.4571140674 |
| O | 0.0000000000 | -0.8866118866 | 0.9118275251  | -0.5681834241 |
| O | 0.0000000000 | -0.9575135775 | -0.7520362004 | -0.6169405839 |
| O | 0.0000000000 | -1.0283156900 | 2.3109249319  | 0.5591633793  |
| H | 0.0000000000 | -1.9326981867 | 2.5202177459  | 0.2947108982  |

**TS5**

|   |              |               |               |               |
|---|--------------|---------------|---------------|---------------|
| C | 0.0000000000 | -0.0007146861 | -0.0106809231 | -0.0004055310 |
| H | 0.0000000000 | -0.0059266974 | 0.0001367935  | 1.0942198480  |
| H | 0.0000000000 | 0.9876709777  | -0.0000235023 | -0.4708626200 |
| O | 0.0000000000 | -1.0085050946 | 0.3904295654  | -0.6402456470 |
| H | 0.0000000000 | -1.4944714787 | -0.7624100500 | -0.9486629816 |
| O | 0.0000000000 | -0.2625494001 | -1.8690617271 | -0.1664435474 |
| O | 0.0000000000 | -1.3386001398 | -1.8816177801 | -0.8496004581 |

**QOOH**

|   |              |               |               |               |
|---|--------------|---------------|---------------|---------------|
| C | 0.0000000000 | -0.0062862376 | 0.0186256052  | 0.0008218907  |
| H | 0.0000000000 | 0.0137483455  | -0.0140231205 | 1.1012833947  |
| H | 0.0000000000 | 1.0411519717  | 0.0057509420  | -0.3553948002 |
| O | 0.0000000000 | -0.5428681182 | 1.1556054700  | -0.4323470769 |
| O | 0.0000000000 | -0.6602936419 | -1.1628422452 | -0.3783339394 |
| O | 0.0000000000 | -0.5129161675 | -1.3032552654 | -1.7823897497 |
| H | 0.0000000000 | -1.2884538530 | -0.8363152963 | -2.1123304727 |

**Int-2**

|   |              |               |               |               |
|---|--------------|---------------|---------------|---------------|
| C | 0.0000000000 | -0.0287546180 | -0.0002033841 | -0.0036855918 |
| O | 0.0000000000 | -0.0003364020 | 0.0010529751  | 1.2002916338  |
| H | 0.0000000000 | 1.6138204441  | -0.0014964658 | 1.9309540125  |
| O | 0.0000000000 | 3.0839494017  | -0.0045618313 | 0.8530330042  |
| O | 0.0000000000 | 2.5900057502  | -0.0033500393 | 2.0660352312  |
| H | 0.0000000000 | 0.8971512673  | -0.0023072428 | -0.5954299135 |
| H | 0.0000000000 | -0.9894628124 | 0.0007558511  | -0.5406506218 |

**CH<sub>2</sub>O**

|   |              |               |               |               |
|---|--------------|---------------|---------------|---------------|
| C | 0.0000000000 | 0.0011696497  | 0.0000154956  | 0.0007329038  |
| H | 0.0000000000 | -0.0039382613 | -0.0000050482 | 1.1054408370  |
| H | 0.0000000000 | 0.9930491043  | -0.0000050482 | -0.4856628774 |
| O | 0.0000000000 | -1.0124345993 | 0.0000760692  | -0.6343926514 |

**HO<sub>2</sub>**

|   |              |              |              |              |
|---|--------------|--------------|--------------|--------------|
| H | 0.0000000000 | 0.0026120666 | 0.0000000000 | 0.0043162627 |
| O | 0.0000000000 | 0.0003509311 | 0.0000000000 | 1.8321080870 |
| O | 0.0000000000 | 0.6714299351 | 0.0000000000 | 0.7075246863 |

**HCOOH**

|   |              |               |               |               |
|---|--------------|---------------|---------------|---------------|
| C | 0.0000000000 | -0.0509297624 | -0.0342820638 | -0.0717948298 |
| H | 0.0000000000 | 0.0337405165  | 0.1000808015  | 1.0114731087  |
| O | 0.0000000000 | 1.1644060204  | -0.1780074025 | -0.6085732287 |
| H | 0.0000000000 | 1.0520232822  | -0.2912013299 | -1.5603938821 |
| O | 0.0000000000 | -1.0756139589 | -0.0491383453 | -0.6845336780 |

**OCH<sub>2</sub>O**

|   |              |               |               |               |
|---|--------------|---------------|---------------|---------------|
| C | 0.0000000000 | 0.0280692408  | 0.0188627259  | 0.0184818093  |
| H | 0.0000000000 | 0.0106231197  | -0.0110146553 | 1.1043374428  |
| H | 0.0000000000 | 1.0024792895  | -0.0056175377 | -0.4613206874 |
| O | 0.0000000000 | -0.9260035340 | 0.8088099941  | -0.5832495504 |
| O | 0.0000000000 | -0.9832493641 | -0.6594415501 | -0.6245454968 |

**OH**

|   |              |              |              |               |
|---|--------------|--------------|--------------|---------------|
| O | 0.0000000000 | 0.0000000000 | 0.0000000000 | -0.0048666837 |
| H | 0.0000000000 | 0.0000000000 | 0.0000000000 | 0.9648666837  |

**CH<sub>2</sub>OH...H<sub>2</sub>O**

|   |              |               |               |               |
|---|--------------|---------------|---------------|---------------|
| C | 0.0000000000 | 0.0486527158  | -0.0039557540 | 0.0087476161  |
| H | 0.0000000000 | 0.1966973397  | 0.0700866281  | 1.0730396851  |
| H | 0.0000000000 | 0.8748181314  | -0.1266933499 | -0.6768704164 |
| O | 0.0000000000 | -1.0720260197 | 0.6309668457  | -0.4354800810 |
| H | 0.0000000000 | -1.1350102209 | 0.5674949200  | -1.3888781115 |
| H | 0.0000000000 | -2.8493507228 | 0.4534423643  | 0.3990043770  |
| O | 0.0000000000 | -3.7640022895 | 0.3777901169  | 0.6916273820  |
| H | 0.0000000000 | -3.9548407967 | 1.2071108009  | 1.1280697347  |

**CH<sub>2</sub>OH...O<sub>2</sub>**

|   |              |               |               |               |
|---|--------------|---------------|---------------|---------------|
| C | 0.0000000000 | -0.0031602723 | -0.0027739050 | 0.0012481211  |
| H | 0.0000000000 | -0.0045698086 | 0.0096388832  | 1.0787702020  |
| H | 0.0000000000 | 0.9197728232  | -0.0317714411 | -0.5620023361 |
| O | 0.0000000000 | -1.0973846528 | 0.5708525973  | -0.5596713209 |
| H | 0.0000000000 | -0.9976803261 | 0.5965109460  | -1.5117911702 |
| O | 0.0000000000 | 0.4319819071  | 0.4813485413  | -3.4824921567 |
| O | 0.0000000000 | 1.5980409905  | 0.6618230202  | -3.2920895155 |

**O<sub>2</sub>...H<sub>2</sub>O**

|   |              |               |               |               |
|---|--------------|---------------|---------------|---------------|
| O | 0.0000000000 | 0.0889537946  | -0.0401543478 | -0.1797437406 |
| H | 0.0000000000 | -0.0643705223 | 0.0401971190  | 2.3837688508  |
| O | 0.0000000000 | 0.0342931576  | 0.0088738087  | 3.3355286875  |
| H | 0.0000000000 | 0.8852272954  | -0.4031194468 | 3.4840379735  |
| O | 0.0000000000 | 1.0639792848  | -0.4925894299 | -0.7022260603 |

**Int-1-H<sub>2</sub>O**

|   |              |               |               |               |
|---|--------------|---------------|---------------|---------------|
| C | 0.0000000000 | -0.0596499412 | 0.0437634792  | 0.0328859719  |
| H | 0.0000000000 | -0.0958686414 | 0.0504197882  | 1.1236030049  |
| H | 0.0000000000 | 0.9566380425  | -0.0354723923 | -0.3435909349 |
| O | 0.0000000000 | -0.6925502682 | 1.0923828867  | -0.5459563434 |
| H | 0.0000000000 | -1.4796377048 | 1.3113277611  | -0.0180694164 |
| O | 0.0000000000 | -0.6422165625 | -1.2531239052 | -0.3683175166 |
| O | 0.0000000000 | -1.8125343680 | -1.4420885982 | 0.1563298189  |
| H | 0.0000000000 | -2.7537641057 | 0.0816619857  | 1.0234339492  |
| O | 0.0000000000 | -2.8185335462 | 1.0289937100  | 1.2080718344  |
| H | 0.0000000000 | -3.7190916162 | 1.2814382700  | 1.0055236556  |

**TS1h**

|   |              |               |               |               |
|---|--------------|---------------|---------------|---------------|
| C | 0.0000000000 | 0.0276348145  | 0.0604791695  | 0.0163792893  |
| H | 0.0000000000 | -0.0444368133 | 0.0269502184  | 1.1261660037  |
| H | 0.0000000000 | 1.1138185619  | -0.0635786991 | -0.2094142281 |
| O | 0.0000000000 | -0.1867017470 | 1.4560703591  | -0.2674320759 |
| O | 0.0000000000 | -1.0943048119 | 1.6404929106  | -1.2805183885 |
| H | 0.0000000000 | -1.5199776257 | 0.7656748432  | -1.4451184059 |
| O | 0.0000000000 | -0.7084903963 | -0.7911463258 | -0.5874738858 |
| H | 0.0000000000 | -2.3369515025 | -1.0506405453 | -1.9551294681 |
| O | 0.0000000000 | -2.8337847700 | -0.3310714059 | -2.3547101722 |
| H | 0.0000000000 | -2.7359396301 | -0.4386459379 | -3.3007355056 |

**TS2h**

|   |              |               |               |               |
|---|--------------|---------------|---------------|---------------|
| C | 0.0000000000 | -0.0697073018 | -0.0022004308 | -0.0209157269 |
| H | 0.0000000000 | -0.0990626032 | 0.0168410565  | 1.0725771024  |
| H | 0.0000000000 | 0.9388473085  | -0.0057573008 | -0.4489231290 |
| O | 0.0000000000 | -1.0022053726 | 0.5823998318  | -0.6703583990 |
| O | 0.0000000000 | -0.4997372153 | -1.5657874691 | -0.3230305206 |
| O | 0.0000000000 | -1.4264982398 | -1.9642992177 | 0.5680036776  |
| H | 0.0000000000 | -2.2669877478 | -1.9018639522 | 0.0463198312  |
| H | 0.0000000000 | -2.7526656711 | -0.1729450294 | -0.8433176081 |
| O | 0.0000000000 | -3.3763175882 | -0.9187096620 | -0.8512023341 |
| H | 0.0000000000 | -3.5094297505 | -1.1274932551 | -1.7760678037 |

**TS3h**

|   |              |               |               |               |
|---|--------------|---------------|---------------|---------------|
| C | 0.0000000000 | -0.0292170026 | 0.0019155327  | 0.0246930141  |
| H | 0.0000000000 | -0.0373241373 | 0.0352144721  | 1.3285282500  |
| H | 0.0000000000 | 1.0106373836  | 0.0172859166  | -0.2969370709 |
| O | 0.0000000000 | -0.7793065394 | 0.9390924098  | -0.5534028386 |
| H | 0.0000000000 | -1.7096952728 | 0.8184840119  | -0.2546895566 |
| O | 0.0000000000 | -0.5731185101 | -1.2609879348 | 0.1437427629  |
| O | 0.0000000000 | -0.6922276262 | -1.1093232868 | 1.5957407622  |
| O | 0.0000000000 | -3.0425440643 | 0.3229430877  | 0.8158805495  |
| H | 0.0000000000 | -3.7137134913 | -0.2187302399 | 0.3998941894  |
| H | 0.0000000000 | -2.4888025995 | -0.2917536805 | 1.3218637356  |

**TS4h**

|   |              |               |               |               |
|---|--------------|---------------|---------------|---------------|
| C | 0.0000000000 | -0.0051511722 | -0.0229882730 | -0.0672782362 |
| H | 0.0000000000 | 0.0264734392  | -0.0464262216 | 1.0205014985  |
| H | 0.0000000000 | 0.9624832813  | -0.0173424573 | -0.5674055455 |
| O | 0.0000000000 | -0.9110712232 | 0.9109980460  | -0.5933005949 |
| O | 0.0000000000 | -0.9875670470 | -0.7563296154 | -0.6714151999 |
| O | 0.0000000000 | -1.0937948424 | 2.2899502273  | 0.5118494916  |
| H | 0.0000000000 | -2.0229659513 | 2.4266508570  | 0.2906692452  |
| H | 0.0000000000 | -0.0903986253 | 1.5644129905  | 3.6377943767  |
| O | 0.0000000000 | -0.5644307251 | 1.0123442735  | 3.0172827849  |
| H | 0.0000000000 | -0.8090474999 | 1.5921857103  | 2.2836048939  |

**TS5h**

|   |              |               |               |               |
|---|--------------|---------------|---------------|---------------|
| O | 0.0000000000 | 1.5680154892  | -0.4854884605 | -0.5488111151 |
| O | 0.0000000000 | 1.3538655318  | -1.0174927336 | 0.5905897678  |
| H | 0.0000000000 | 0.6029103828  | -0.2973910825 | 0.9811933286  |
| O | 0.0000000000 | -0.0690470978 | 0.8079265563  | 0.6665902309  |
| C | 0.0000000000 | 0.4484515027  | 0.9755952248  | -0.4783090834 |
| H | 0.0000000000 | 1.2408604491  | 1.7181480286  | -0.6076444431 |
| H | 0.0000000000 | -0.1301417127 | 0.7297076898  | -1.3730450996 |
| O | 0.0000000000 | -2.4789560491 | -0.3198365273 | -0.3061485811 |
| H | 0.0000000000 | -3.3203660486 | -0.0327250247 | 0.0455508252  |
| H | 0.0000000000 | -1.8076134473 | 0.0979213292  | 0.2493521697  |

**TS6h**

|   |              |               |               |               |
|---|--------------|---------------|---------------|---------------|
| O | 0.0000000000 | -0.0247538013 | -0.0053901477 | -0.0267449109 |
| O | 0.0000000000 | -0.0086062727 | -0.0004718186 | 1.2480059737  |
| H | 0.0000000000 | 1.1268557341  | 0.0027481410  | 1.4011009036  |
| O | 0.0000000000 | 2.2562127412  | 0.0031217349  | 0.8151727266  |
| C | 0.0000000000 | 1.8514104651  | -0.0023768722 | -0.3786874802 |
| H | 0.0000000000 | 1.8450766616  | -0.9284246448 | -0.9593136990 |
| H | 0.0000000000 | 1.8407901391  | 0.9191649794  | -0.9663745413 |
| O | 0.0000000000 | 0.0934473476  | -0.0159715997 | -2.9186204103 |
| H | 0.0000000000 | -0.6767475338 | -0.0156450482 | -2.3481200179 |
| H | 0.0000000000 | -0.2497876821 | -0.0201603040 | -3.8116708744 |

**QOOH-H<sub>2</sub>O**

|   |              |               |               |               |
|---|--------------|---------------|---------------|---------------|
| C | 0.0000000000 | -0.0108994851 | 0.0296477813  | 0.0015791604  |
| H | 0.0000000000 | 0.1887752359  | -0.0025116235 | 1.0768754733  |
| H | 0.0000000000 | 0.9043532217  | 0.1104487785  | -0.5867754311 |
| O | 0.0000000000 | -0.9319961344 | 1.0168321272  | -0.2770146851 |
| O | 0.0000000000 | -0.6660628997 | -1.1775974864 | -0.3112247572 |
| O | 0.0000000000 | -0.5040668857 | -1.4394719493 | -1.6913196728 |
| H | 0.0000000000 | -1.3042217501 | -1.0217377618 | -2.0713208300 |
| H | 0.0000000000 | -3.4063915988 | -0.0308042802 | -1.9865372344 |
| O | 0.0000000000 | -2.5889914519 | 0.1930239525  | -2.4337223983 |
| H | 0.0000000000 | -2.2108648465 | 0.9114585936  | -1.9144437522 |

**Int-2-H<sub>2</sub>O**

|   |              |               |               |               |
|---|--------------|---------------|---------------|---------------|
| C | 0.0000000000 | 0.0526387377  | -0.0047618798 | 0.0401452073  |
| O | 0.0000000000 | 0.0240226047  | 0.0203793586  | 1.2469110028  |
| H | 0.0000000000 | 1.3191492031  | 0.0076756416  | 2.3637629431  |
| O | 0.0000000000 | 3.1553421604  | 0.1925475644  | 2.5220905180  |
| O | 0.0000000000 | 1.9943324080  | 0.0133571109  | 3.0903231758  |
| H | 0.0000000000 | 1.0016728007  | -0.0623764431 | -0.5089547419 |
| H | 0.0000000000 | -0.8893490702 | 0.0351462015  | -0.5279298073 |
| H | 0.0000000000 | 3.2191037940  | 0.2307065606  | 0.6391156610  |
| O | 0.0000000000 | 3.1312368068  | 0.2129206731  | -0.3260512855 |
| H | 0.0000000000 | 3.9673474489  | -0.1130580725 | -0.6558344845 |

**H<sub>2</sub>O**

|   |              |               |              |               |
|---|--------------|---------------|--------------|---------------|
| O | 0.0000000000 | -0.0152501390 | 0.0000000000 | -0.0107777327 |
| H | 0.0000000000 | 0.0217368448  | 0.0000000000 | 0.9454211661  |
| H | 0.0000000000 | 0.8984491253  | 0.0000000000 | -0.2950980192 |

**Table S2:** Calculated equilibrium constants ( $K_{eq}$  in  $\text{cm}^3 \text{ molecule}^{-1}$ ) for the formation of two-body complexes.

| T(K) | $K_{eq(1)}$<br>(CH <sub>2</sub> OH<br>+H <sub>2</sub> O→<br>CH <sub>2</sub> OH—<br>H <sub>2</sub> O) | $K_{eq(2)}$<br>(CH <sub>2</sub> OH<br>+O <sub>2</sub> →<br>CH <sub>2</sub> OH--O <sub>2</sub> ) | $K_{eq(3)}$<br>(O <sub>2</sub> + H <sub>2</sub> O<br>→OH--H <sub>2</sub> O) |
|------|------------------------------------------------------------------------------------------------------|-------------------------------------------------------------------------------------------------|-----------------------------------------------------------------------------|
| 200  | 6.47E-22                                                                                             | 1.10E-24                                                                                        | 1.58E-22                                                                    |
| 225  | 3.02E-22                                                                                             | 1.00E-24                                                                                        | 1.72E-22                                                                    |
| 250  | 1.68E-22                                                                                             | 9.56E-25                                                                                        | 1.88E-22                                                                    |
| 275  | 1.06E-22                                                                                             | 9.40E-25                                                                                        | 2.07E-22                                                                    |
| 300  | 7.32E-23                                                                                             | 9.45E-25                                                                                        | 2.28E-22                                                                    |
| 325  | 5.44E-23                                                                                             | 9.63E-25                                                                                        | 2.51E-22                                                                    |
| 350  | 4.27E-23                                                                                             | 9.93E-25                                                                                        | 2.77E-22                                                                    |
| 375  | 3.50E-23                                                                                             | 1.03E-24                                                                                        | 3.05E-22                                                                    |
| 400  | 2.98E-23                                                                                             | 1.08E-24                                                                                        | 3.35E-22                                                                    |



**Table S3:** Calculated equilibrium constants ( $K_{eq}$  in  $\text{cm}^3 \text{ molecule}^{-1}$ ) for the formation of three-body complex.

| T<br>(K) | $K_{eq(A)}$<br>( $\text{CH}_2\text{OH} + \text{H}_2\text{O} + \text{O}_2 \rightarrow \text{Int-H}_2\text{O}$ ) | $K_{eq(B)}$<br>( $\text{CH}_2\text{OH} + \text{O}_2 + \text{H}_2\text{O} \rightarrow \text{Int-H}_2\text{O}$ ) | $K_{eq(C)}$<br>( $\text{OH} + \text{H}_2\text{O} \rightarrow \text{Int-H}_2\text{O}$ ) |
|----------|----------------------------------------------------------------------------------------------------------------|----------------------------------------------------------------------------------------------------------------|----------------------------------------------------------------------------------------|
| 200      | 1.30E+12                                                                                                       | 7.78E+14                                                                                                       | 5.39E+12                                                                               |
| 225      | 3.74E+07                                                                                                       | 1.14E+10                                                                                                       | 6.67E+07                                                                               |
| 250      | 8.54E+03                                                                                                       | 1.52E+06                                                                                                       | 7.73E+03                                                                               |
| 275      | 8.86E+00                                                                                                       | 1.01E+03                                                                                                       | 4.59E+00                                                                               |
| 300      | 2.86E-02                                                                                                       | 2.24E+00                                                                                                       | 9.29E-03                                                                               |
| 325      | 2.22E-04                                                                                                       | 1.27E-02                                                                                                       | 4.85E-05                                                                               |
| 350      | 3.44E-06                                                                                                       | 1.49E-04                                                                                                       | 5.34E-07                                                                               |
| 375      | 9.24E-08                                                                                                       | 3.17E-06                                                                                                       | 1.07E-08                                                                               |
| 400      | 3.90E-09                                                                                                       | 1.09E-07                                                                                                       | 3.49E-10                                                                               |

**Table S4:** Calculated rate coefficients for the  $\cdot\text{CH}_2\text{OH} + \text{O}_2$  and  $\cdot\text{CH}_2\text{OH} + \text{O}_2 (+\text{H}_2\text{O})$  in the temperature range of 500 to 1500K.

| Temp                                       | $k_{\text{CH}_2\text{OH}+\text{O}_2}$                              | <i>Literature Value</i> | k-TS5h                                                               | k-TS6h                                                               | $k_{\text{total-cvt/sct}}$                                           | $k_{\text{total-TST/Eckart}}$                                        |
|--------------------------------------------|--------------------------------------------------------------------|-------------------------|----------------------------------------------------------------------|----------------------------------------------------------------------|----------------------------------------------------------------------|----------------------------------------------------------------------|
| 500                                        | $1.5 \times 10^{-11}$                                              | $3.1 \times 10^{-11}$   | $5.6 \times 10^{-12}$                                                | $4.8 \times 10^{-13}$                                                | $1.51 \times 10^{-12}$                                               | $6.1 \times 10^{-12}$                                                |
| 600                                        | $1.2 \times 10^{-11}$                                              | $6.4 \times 10^{-11}$   | $1.8 \times 10^{-13}$                                                | $1.6 \times 10^{-14}$                                                | $6.05 \times 10^{-14}$                                               | $1.9 \times 10^{-13}$                                                |
| 700                                        | $9.8 \times 10^{-12}$                                              | $1.12 \times 10^{-11}$  | $1.8 \times 10^{-14}$                                                | $1.5 \times 10^{-15}$                                                | $6.83 \times 10^{-15}$                                               | $1.9 \times 10^{-14}$                                                |
| 800                                        | $8.4 \times 10^{-12}$                                              | -                       | $3.4 \times 10^{-15}$                                                | $2.8 \times 10^{-16}$                                                | $1.46 \times 10^{-15}$                                               | $3.6 \times 10^{-15}$                                                |
| 900                                        | $7.2 \times 10^{-12}$                                              | -                       | $9.9 \times 10^{-16}$                                                | $8.3 \times 10^{-17}$                                                | $4.73 \times 10^{-16}$                                               | $1.1 \times 10^{-15}$                                                |
| 1000                                       | $6.2 \times 10^{-12}$                                              | $1.45 \times 10^{-11}$  | $3.9 \times 10^{-16}$                                                | $3.3 \times 10^{-17}$                                                | $2.04 \times 10^{-16}$                                               | $4.3 \times 10^{-16}$                                                |
| 1100                                       | $5.4 \times 10^{-12}$                                              | $1.82 \times 10^{-11}$  | $1.9 \times 10^{-16}$                                                | $1.6 \times 10^{-17}$                                                | $1.07 \times 10^{-16}$                                               | $2.1 \times 10^{-16}$                                                |
| 1200                                       | $4.7 \times 10^{-12}$                                              | $2.20 \times 10^{-11}$  | $1.2 \times 10^{-16}$                                                | $9.3 \times 10^{-18}$                                                | $6.59 \times 10^{-17}$                                               | $1.3 \times 10^{-16}$                                                |
| 1300                                       | $4.1 \times 10^{-12}$                                              | $2.59 \times 10^{-11}$  | $7.6 \times 10^{-17}$                                                | $6.1 \times 10^{-18}$                                                | $4.52 \times 10^{-17}$                                               | $8.2 \times 10^{-17}$                                                |
| 1400                                       | $3.7 \times 10^{-12}$                                              | $2.97 \times 10^{-11}$  | $5.5 \times 10^{-17}$                                                | $4.3 \times 10^{-18}$                                                | $3.37 \times 10^{-17}$                                               | $5.9 \times 10^{-17}$                                                |
| 1500                                       | $3.2 \times 10^{-12}$                                              | -                       | $4.4 \times 10^{-17}$                                                | $3.3 \times 10^{-18}$                                                | $2.70 \times 10^{-17}$                                               | $4.6 \times 10^{-17}$                                                |
| $k = \text{AT}^n \exp(-\text{B}/\text{T})$ | $\text{A} = 5.8 \times 10^{-06}$<br>$n = -1.9$<br>$\text{B} = 456$ |                         | $\text{A} = 2.8 \times 10^{-38}$<br>$n = 5.5$<br>$\text{B} = -13342$ | $\text{A} = 3.4 \times 10^{-38}$<br>$n = 5.1$<br>$\text{B} = -13133$ | $\text{A} = 5.4 \times 10^{-38}$<br>$n = 5.4$<br>$\text{B} = -12633$ | $\text{A} = 7.0 \times 10^{-38}$<br>$n = 5.3$<br>$\text{B} = -13271$ |

**Figure S1:** IRC Calculations for the important transition states

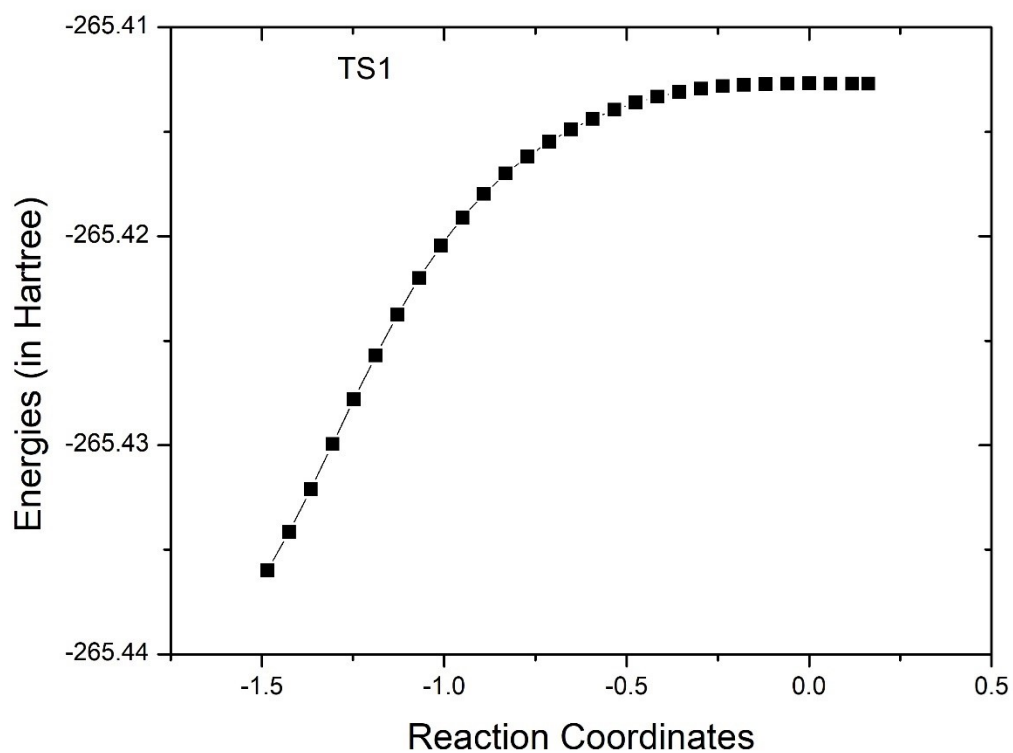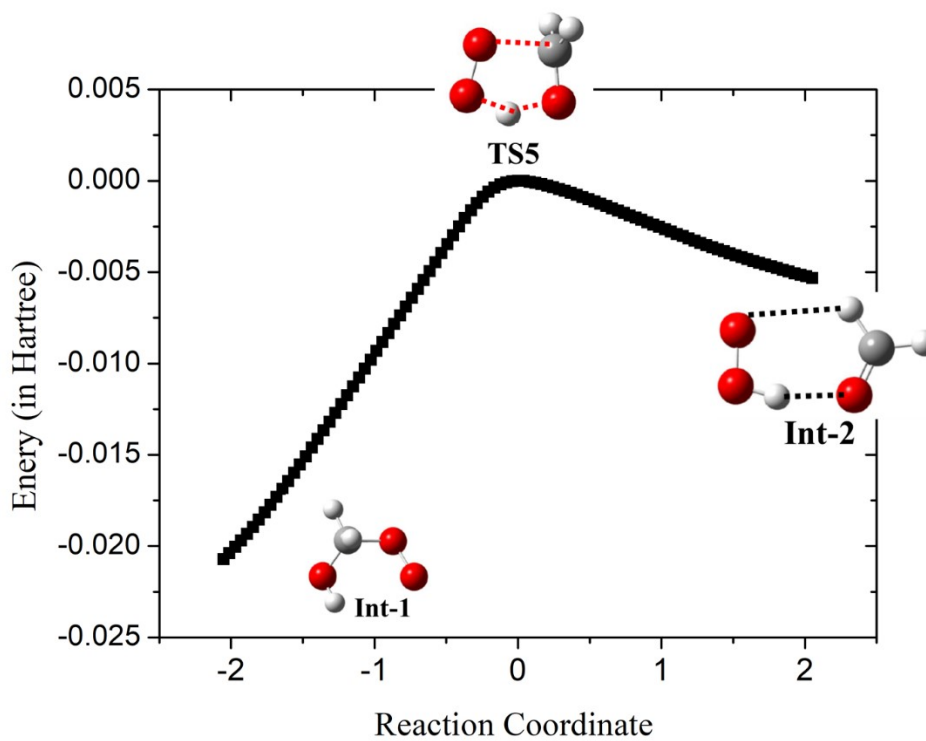

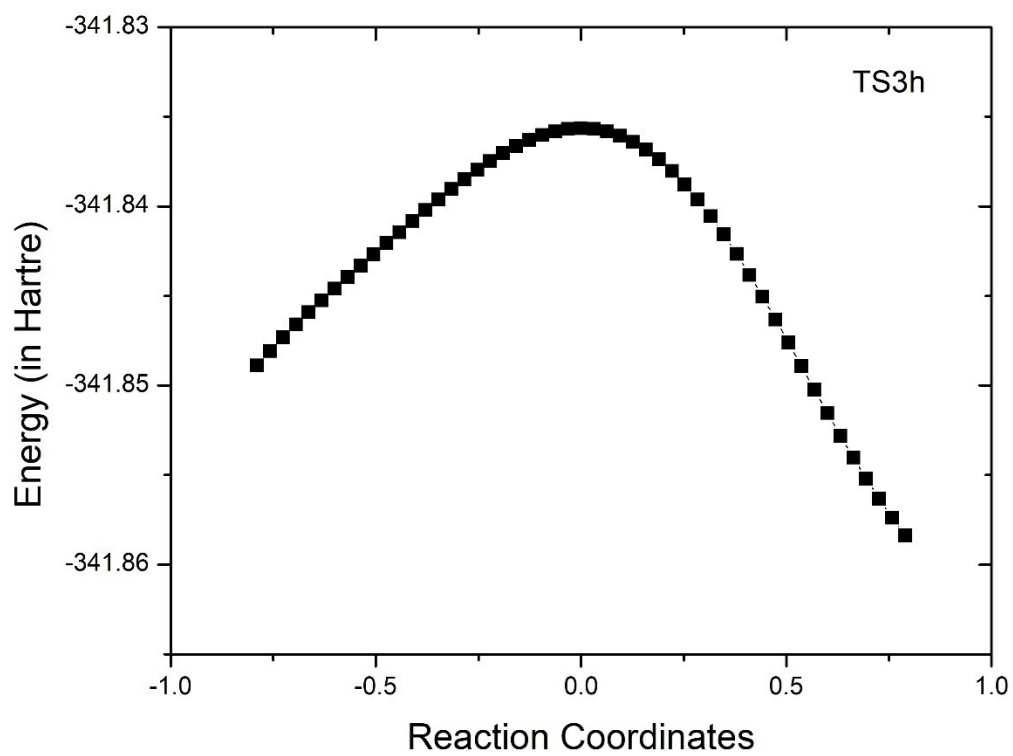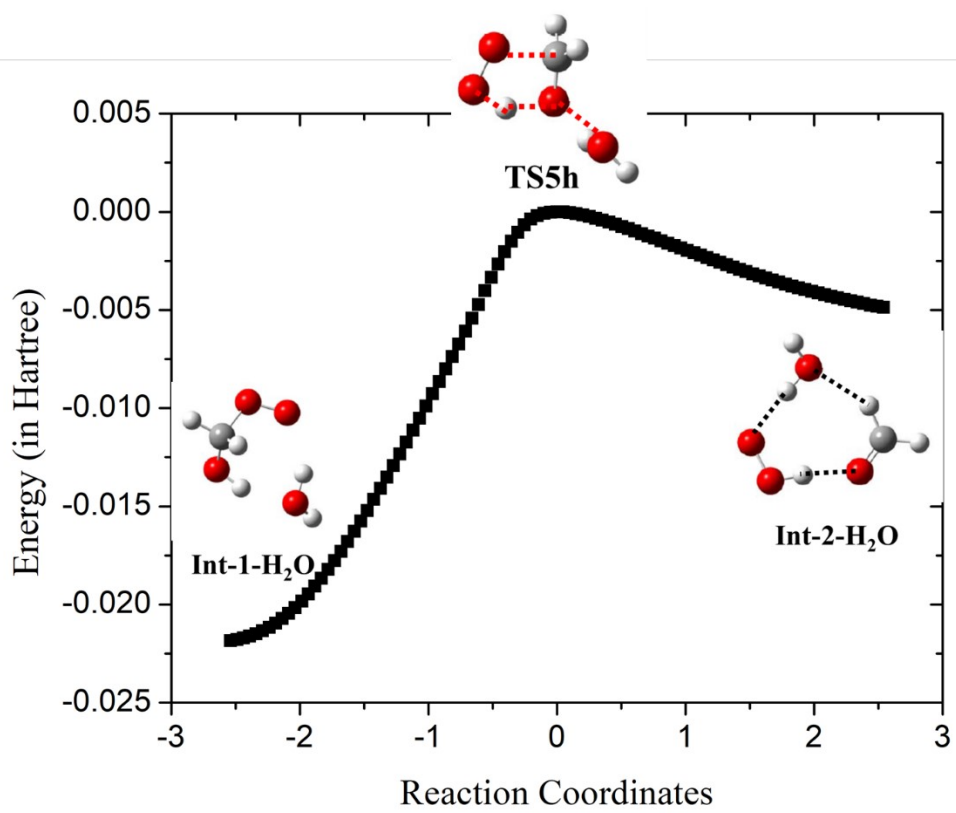

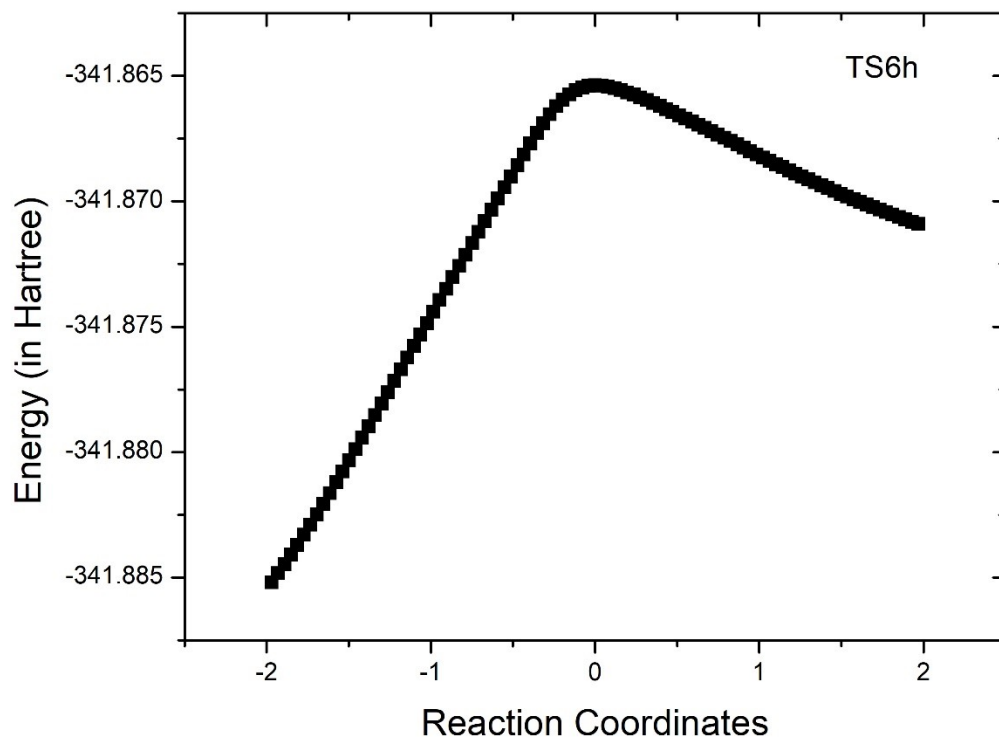

Supplement: d1cp03911c1.pdf [file d1cp03911c1.pdf]
